# Supplementary material
Source: publisher figshare collection journal article supplement (https://aacr.figshare.com/ndownloader/files/39916907)
Supplement: Supplementary file 1 [file 39916907]

### Supplemental Table 3.

*Statistical analysis of AK lesional clearance rates at 3 months and 6 months following PDT.*

***A linear mixed-effects model was used to compare responses to the treatments as a function of body site, and as a function of immunological status.***

The model was applied to compare lesion responses at 3, 6, 9, and 12 months after PDT treatment  $\pm$  5FU pretreatment. Values shown in the tables are the lesion clearance rate (CR; % reduction in initial lesion counts). Analyses are stratified according to body site, or for all sites combined, with P-values indicated. Data were adjusted for body site location and baseline number of lesions. *CI*, confidence interval. Relative differences at 9 and 12 months were not statistically significant (data not shown).

#### At 3 months

|                                           | No 5FU [95% CI]            | + 5FU [95% CI]             | P-value | Comment                                              |
|-------------------------------------------|----------------------------|----------------------------|---------|------------------------------------------------------|
| Overall CR                                | <b>45.9%</b> [36.3, 55.5]  | <b>74.5%</b> [64.9, 84.1%] | < 0.001 | Adjusted for location and baseline number of lesions |
| <i>Subgroup analysis by location</i>      |                            |                            |         |                                                      |
| Face                                      | <b>60.3%</b> [43.7, 77.0%] | <b>83.0%</b> [66.4, 99.7%] | < 0.001 | Adjusted for baseline number of lesions              |
| Scalp                                     | <b>31.0%</b> [22.3, 39.8%] | <b>72.1%</b> [63.3, 80.8%] | < 0.001 | Adjusted for baseline number of lesions              |
| Forearms                                  | <b>48.4%</b> [2.8, 94.1%]  | <b>65.8%</b> [20.2, 100%]  | 0.10    | Adjusted for baseline number of lesions              |
| <i>Subgroup analysis by immune status</i> |                            |                            |         |                                                      |
| Normal                                    | <b>49.5%</b> [40.1, 58.8%] | <b>73.4%</b> [64.0, 82.7%] | < 0.001 | Adjusted for baseline # of lesions, and for location |
| Organ transplant                          | <b>34.6%</b> [4.3, 64.8%]  | <b>76.7%</b> [46.1, 100%]  | < 0.001 | Adjusted for baseline # of lesions, and for location |

#### At 6 months

|                                           | No 5FU [95% CI]            | + 5FU [95% CI]             | P-value | Comment                                              |
|-------------------------------------------|----------------------------|----------------------------|---------|------------------------------------------------------|
| Overall CR                                | <b>38.8%</b> [25.7, 51.8]  | <b>66.9%</b> [53.8, 80.0%] | < 0.001 | Adjusted for location and baseline number of lesions |
| <i>Subgroup analysis by location</i>      |                            |                            |         |                                                      |
| Face                                      | <b>52.3%</b> [31.5, 73.2%] | <b>71.6%</b> [50.8, 92.5%] | 0.07    | Adjusted for baseline number of lesions              |
| Scalp                                     | <b>28.1%</b> [17.2, 39.0%] | <b>57.2%</b> [46.3, 68.1%] | < 0.001 | Adjusted for baseline number of lesions              |
| Forearms                                  | <b>33.4%</b> [4.6, 62.2%]  | <b>77.9%</b> [49.1, 100%]  | < 0.001 | Adjusted for baseline number of lesions              |
| <i>Subgroup analysis by immune status</i> |                            |                            |         |                                                      |
| Normal                                    | <b>43.1%</b> [29.2, 57.0%] | <b>69.0%</b> [55.1, 82.9%] | < 0.001 | Adjusted for baseline # of lesions, and for location |
| Organ transplant                          | <b>23.8%</b> [0, 55.8%]    | <b>58.4%</b> [26.3, 90.4%] | 0.005   | No adjustment due to small sample size               |
